# Supplementary material
Source: ML conference proceedings conference paper supplement (https://aclanthology.org/P18-2108)
Supplement: Notes [file P18-2108.Notes.pdf]

## A Supplemental Material

### A.1 Data Statistics

The statistics of the data set is shown in Table 5. This shows that the data is highly unbalanced and includes more negative pairs than positive pairs.

|          | DDI type         | Train  | Test  |
|----------|------------------|--------|-------|
| Positive | <i>Mechanism</i> | 1,319  | 302   |
|          | <i>Effect</i>    | 1,687  | 360   |
|          | <i>Advice</i>    | 826    | 221   |
|          | <i>Int</i>       | 189    | 96    |
|          | Total            | 4,021  | 979   |
| Negative |                  | 23,771 | 4,737 |
| Total    |                  | 27,792 | 5,716 |

Table 5: Statistics of the DDIExtraction 2013 shared task data set

### A.2 Hyper-parameter Settings

We show hyper-parameters for training text-based model and molecular-based model in Tables 6 and 7, respectively.

| Parameter                    | Value     |
|------------------------------|-----------|
| Word embedding size          | 200       |
| Word position embedding size | 20        |
| Convolution window size      | [3, 5, 7] |
| Convolution filter size      | 100       |
| Hidden layer size            | 500       |
| Initial learning rate        | 0.001     |
| Mini-batch size              | 50        |
| L2 regularization parameter  | 0.0001    |

Table 6: Hyperparameters for text-based model

| Parameter                | Value |
|--------------------------|-------|
| Molecular vector size    | 50    |
| Number of steps          | 4     |
| Hidden layer size        | 1,000 |
| Initial learning rate    | 0.001 |
| Mini-batch size          | 100   |
| Hidden layer size of NFP | 50    |
| GRU unit size of GGNN    | 50    |

Table 7: Hyperparameters for molecular-based model
